# Supplementary material for: Zein improved GF separator for dendrite-free aqueous zinc-ion batteries
Source: Royal Society of Chemistry journal article supplement (doi:10.1039/d4ta06336h), 2024-01-01
Supplement: d4ta06336h1.pdf [file d4ta06336h1.pdf]

1

## Supporting information

2 **Biomass Zein Improved GF Separator for Dendrite-Free Aqueous Zinc-**

3 **Ion Batteries**

4 Bozhong Cao<sup>a#</sup>, Qian Qu<sup>a#</sup>, Bingchun Jiang<sup>a</sup>, Tianyu Zou<sup>a</sup>, Shubing Zhen<sup>a</sup>, Peiwen Wang<sup>a</sup>,

5 Kairui Li<sup>a</sup>, Jincheng Zhang<sup>a</sup>, Hui Guo<sup>a</sup>, Tong Zhang<sup>a,b\*</sup>

6 <sup>a</sup>. *College of Mechanical and Electrical Engineering, Guangdong University of Science and Technology, Dongguan*

7 *523000, China*

8 <sup>b</sup>. *Faculty of Digital Science and Technology, Macau Millennium College, 999078, China*

9 # These authors contributed to the work equally and should be regarded as co-first authors.

10 \* Corresponding authors.

11 **Experimental Section**

12 **Chemicals and materials.**

13 All reagents and materials used in this study were obtained commercially without further  
14 purification. Zinc sulfate heptahydrate ( $\text{ZnSO}_4 \cdot 7\text{H}_2\text{O}$ , purity 99%), manganese sulfate  
15 monohydrate ( $\text{MnSO}_4 \cdot \text{H}_2\text{O}$ , purity 99%), Lithium bromide (LiBr, purity 99%), anhydrous  
16 ethanol (purity 99.5%), and Zein (from Corn) were purchased from Aladdin Reagent. Zn foil,  
17 Cu foil and Ti foil were purchased from Qingyuan Metal Materials. Glass fiber separator was  
18 purchased from Whatman.

19 **Preparation of zein and zein/LiBr solutions.**

20 A certain amount of zein was first dissolved in 80 wt% ethanol-water solution and stirred for  
21 15 min at room temperature to obtain 0.08 g/mL of zein solution. Different amount of LiBr  
22 (0.02 g/mL, 0.04 g/mL, 0.06 g/mL) was added to the zein solution and stirred at 80 °C for 30  
23 min, which was left to room temperature to obtain the zein/LiBr solution.

24 **Preparation of Z-GF and ZLB-GF separator.**

25 The glass fiber separator was immersed in the above zein solution, then treated with

26 ultrasound. Subsequently, ethanol and water were removed from the Z-GF separator by  
27 drying at 65 °C. ZLB-GF separator was also obtained by this method, only replace the zein  
28 solution with zein/LiBr solution

#### 29 **Preparation of the electrolytes.**

30 The 2M ZnSO<sub>4</sub> electrolyte was prepared by dissolving zinc sulfate heptahydrate in deionized  
31 water.

#### 32 **Preparation of MnO<sub>2</sub> electrode.**

33 MnO<sub>2</sub>, Super P and PVDF were combined in a mass ratio of 7:2:1. To achieve a homogeneous  
34 slurry, an appropriate amount of N-methylpyrrolidone (NMP) solvent was added. This slurry  
35 was then coated onto a titanium foil using a 100 μm squeegee. The coating was then dried  
36 at 70°C.

#### 37 **Characterizations.**

38 Surface morphology and corresponding elemental analysis were obtained using a Tescan  
39 Mira scanning electron microscope (SEM). X-ray diffraction (XRD) patterns were collected  
40 using a Rigaku SmartLab SE with Cu Kα ( $\alpha = 1.5406 \text{ \AA}$ ) as the radiation source. Fourier  
41 transform infrared (FTIR) spectroscopy was performed using a Thermo Scientific iN10  
42 instrument. X-ray photoelectron spectroscopy (XPS) was conducted using a Thermo  
43 Scientific Kalpha spectrometer. Thermogravimetric(TG) was conducted using a Netzsch STA  
44 449 F5. the tensile stress-strain curves of the separators were obtained using a tensile  
45 testing machine (CMT6103) at a cross-head speed of 1 mm/min. Laser scanning microscope  
46 images were obtained by 3D measuring laser microscope (Keyence VK-X1000).

#### 47 **Electrochemical Measurements.**

48 The electrochemical measurements were conducted using symmetric/asymmetric/full cells

49 by assembling with GF or ZLB-GF into 2032-type coin cells at room temperature.  
50 Galvanostatic charge/discharge (GCD) cycling tests were carried out on the LAND CT3002A  
51 battery-testing system. Electrochemical impedance spectroscopy (EIS), chronoamperometry  
52 (CA), linear sweep voltammetry (LSV) and cyclic voltammetry (CV) measurements of the cells  
53 were recorded on an electrochemical workstation (CHI604E, China).

#### 54 **DFT calculation.**

55 The binding energy of the configuration ( $E_{bind}$ ) was calculated by the following equation.

$$56 \quad E_{bind} = E_{AB} - (E_A + E_B)$$

57 In the above equation,  $E$ ,  $E_s$ , and  $E_{as}$  represent the energies of A ( $Zn^{2+}$ ), B (single polymer),  
58 and the complex energy, respectively. A negative value for  $E_{bind}$  indicates an exothermic  
59 reaction, with a higher negative value indicating a stronger interaction. This stronger  
60 interaction corresponds to a greater release of heat and a more stable product.

#### 61 **Finite element modelling.**

62 In the simplified model, the bare separator was built as a sieve plate with a thickness of 8.0  
63  $\mu m$ , which was composed of rectangular channels with an aperture of 1.0  $\mu m$  and a hole  
64 spacing of 2.0  $\mu m$ . Using a 0.05  $\mu m$  film under the pristine separator to represent the coated  
65 zein. The cathodic potential was set as 150 mV, which was in line with the experimentally  
66 observed voltage hysteresis, while the prototype point was fixed at 0 V. The electrical  
67 conductivity of anode/cathode, GF separator and zein was  $1.67 \times 10^7$ ,  $1 \times 10^{-7}$  and  $1 \times 10^{-16}$   
68  $S \cdot m^{-1}$ , respectively. The ionic conductivity of 2 M  $ZnSO_4$  electrolyte was  $5 S \cdot m^{-1}$ .

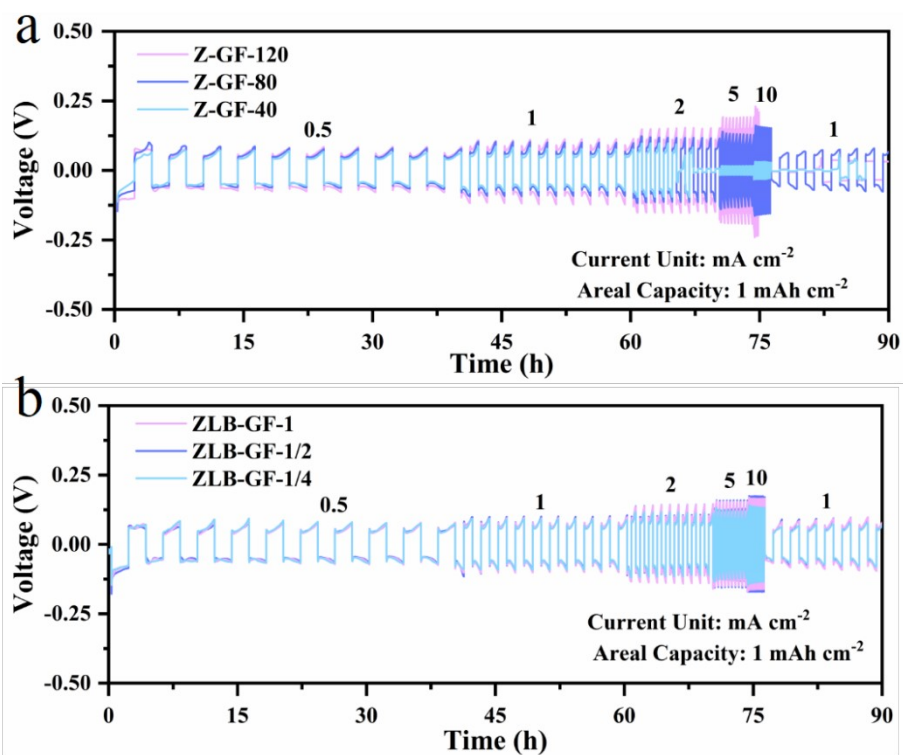

69

70 **Figure S1.** The rate performances of Z-GF-x(a) and ZLB-GF-y(b) separators at various current

71 densities with a fixed areal capacity of 1 mAh·cm<sup>-2</sup>.

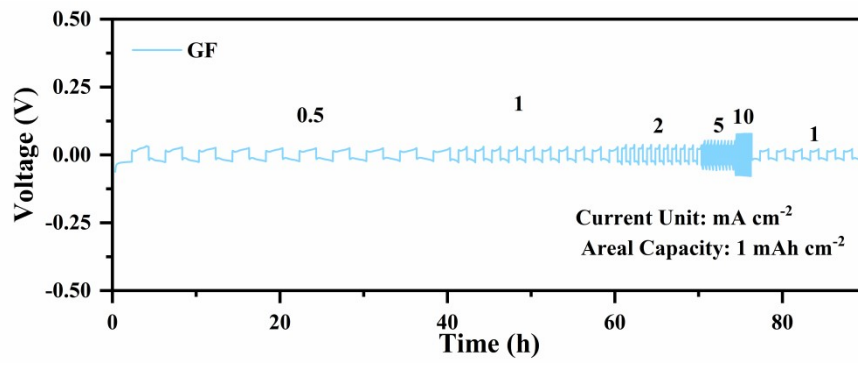

73 **Figure S2.** The rate performances of GF separator at various current densities with a fixed  
74 areal capacity of 1 mAh·cm<sup>-2</sup>.

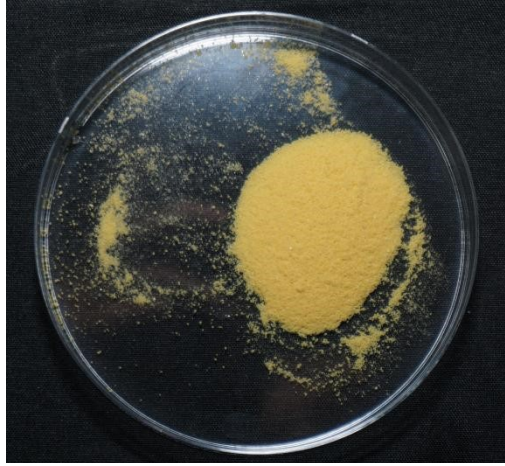

**Figure S3.** The picture of zein powder.

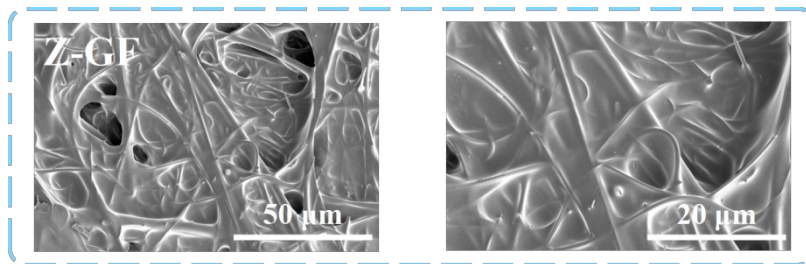

**Figure S4.** SEM images of Z-GF separator.

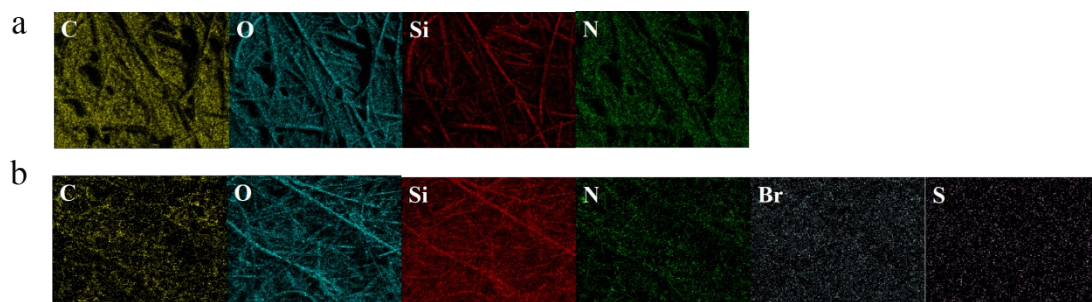

**Figure S5.** EDS mapping of (a) Z-GF and (b) ZLB-GF separator.



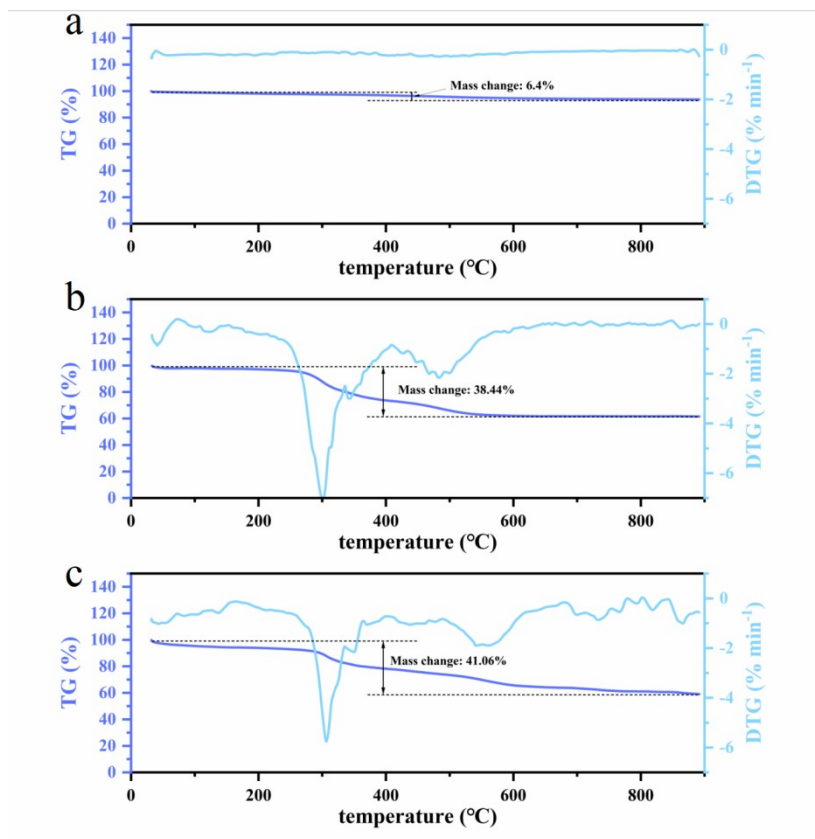

**Figure S6.** TG-DTA curves of GF (a), Z-GF(b) and ZLB-GF(c) separators.

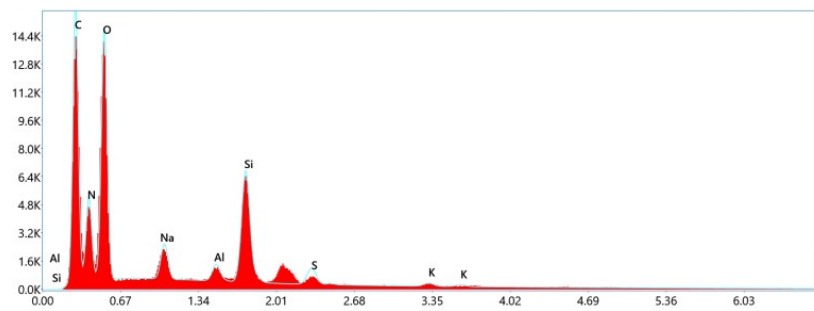

**Figure S7.** Elemental mapping result of the Z-GF separator.

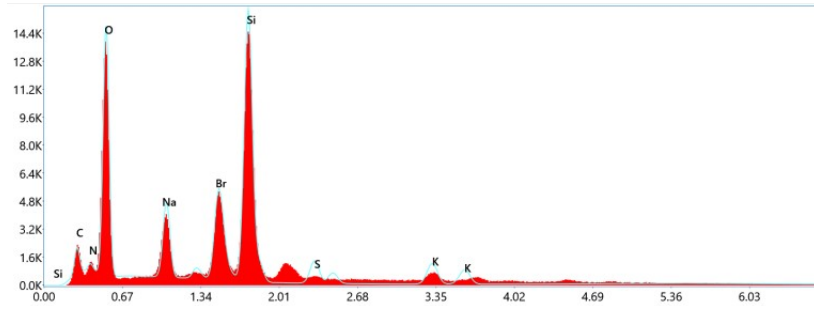

**Figure S8.** Elemental mapping result of the ZLB-GF separator.

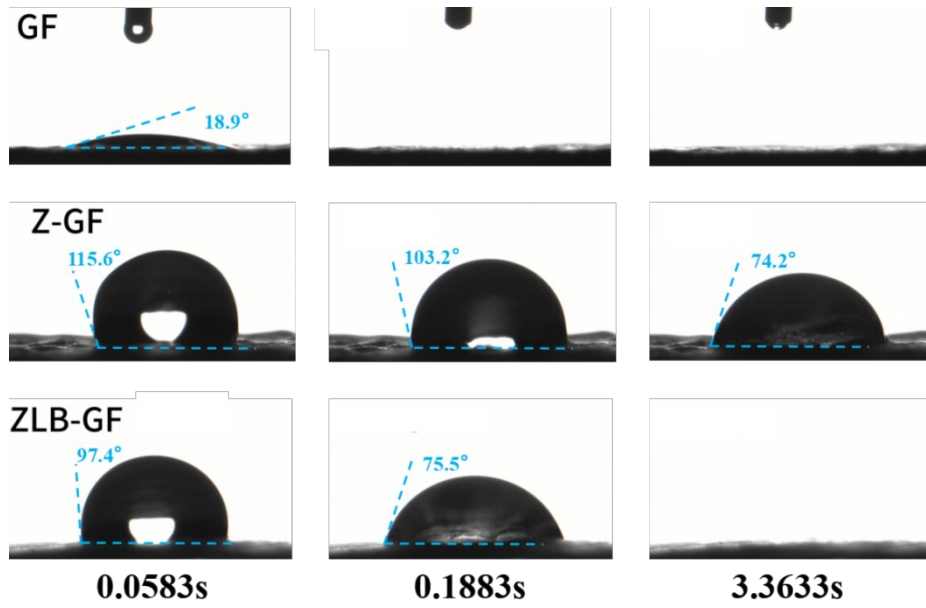

**Figure S9.** Contact angles of GF, Z-GF and ZLB-GF separators.

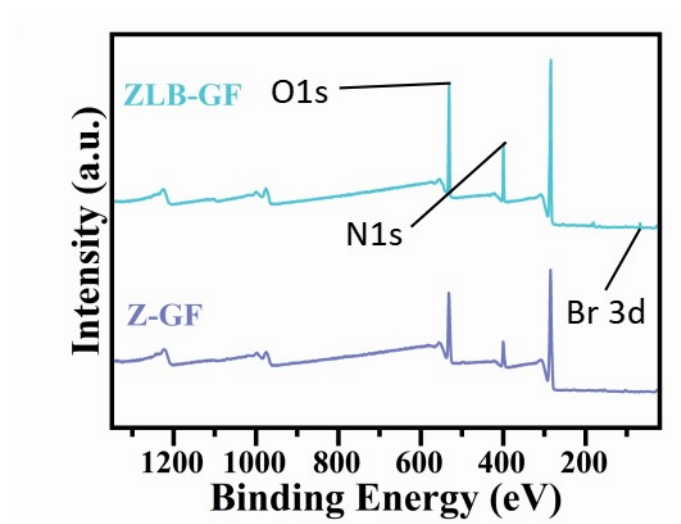

**Figure S10.** XPS spectra of Z-GF and ZLB-GF separators.

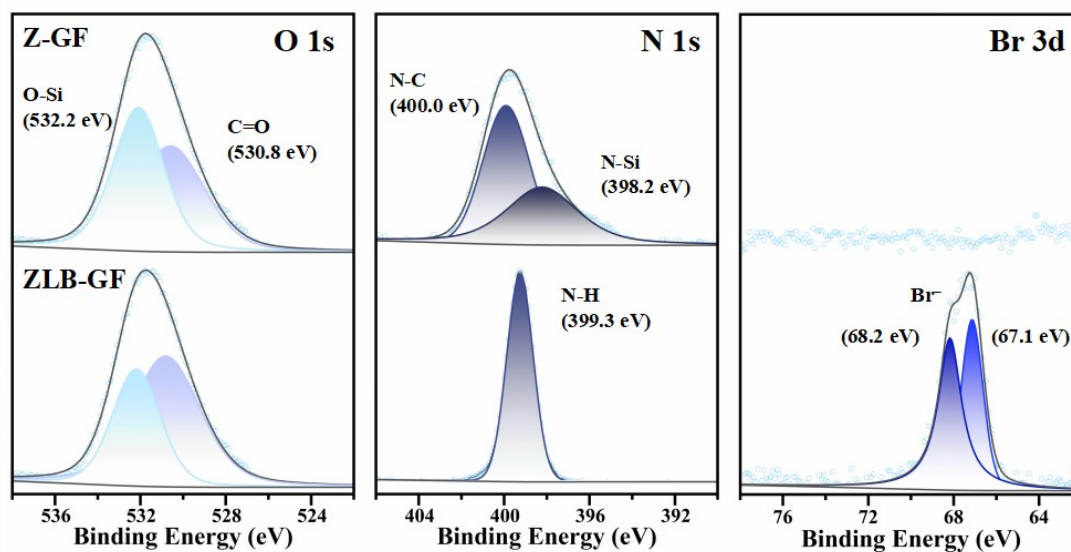

**Figure S11.** High-resolution O 1s, N 1s, Br 3d XPS spectra of Z-GF and ZLB-GF separators.

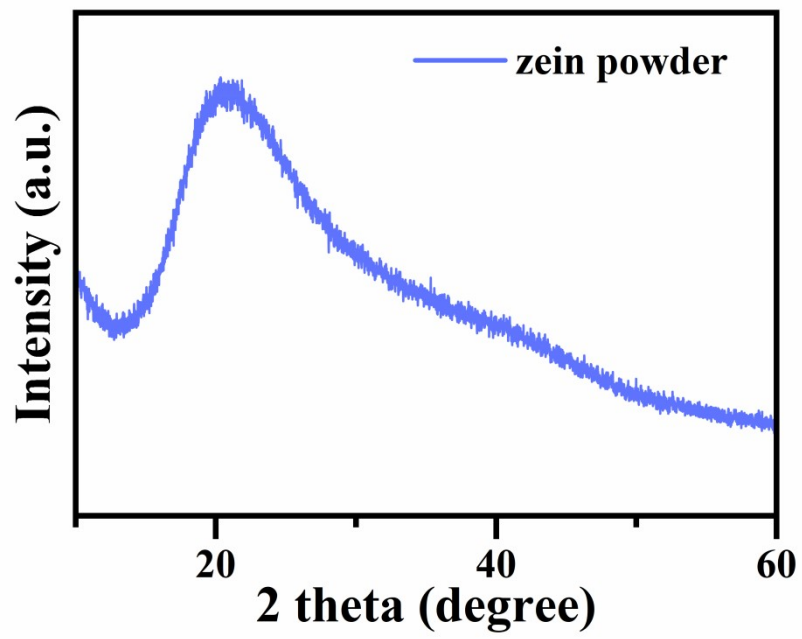

Figure S12. XRD spectra of zein powder.

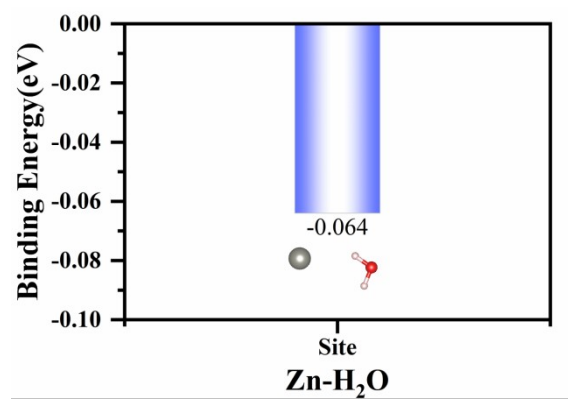

**Figure S13.** Binding energy between Zn<sup>2+</sup> and H<sub>2</sub>O molecule.



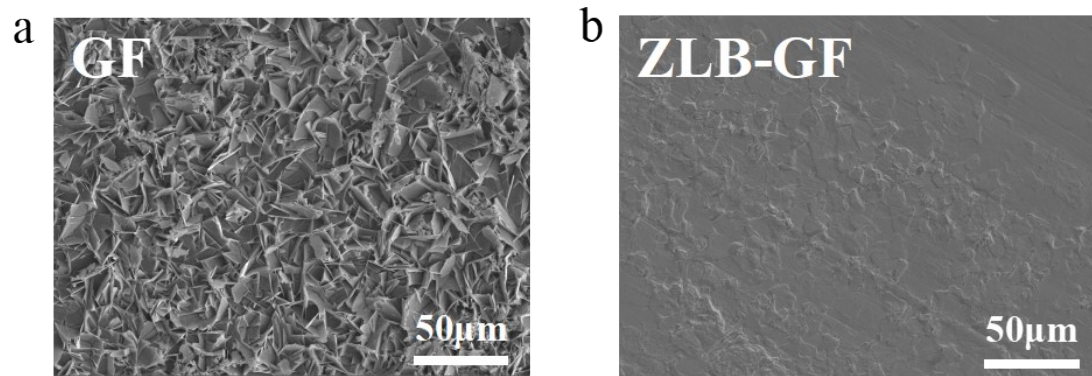

**Figure S14.** SEM images of zinc anode with (a) GF and (b) ZLB-GF resting for seven days.

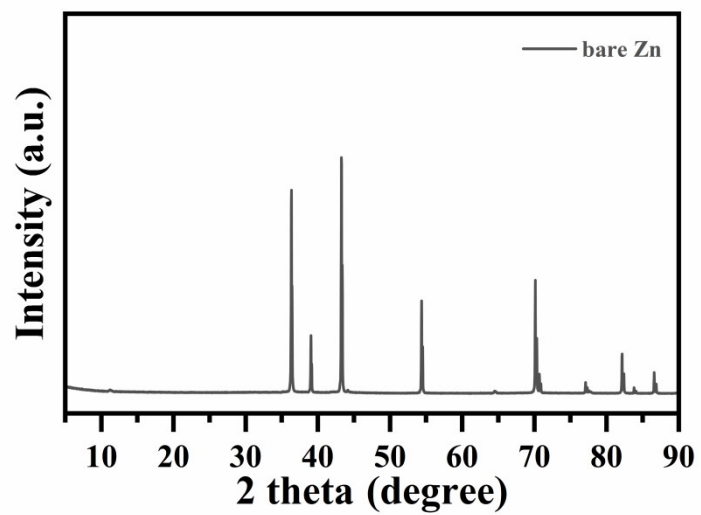

Figure S15. XRD spectra of bare Zn.

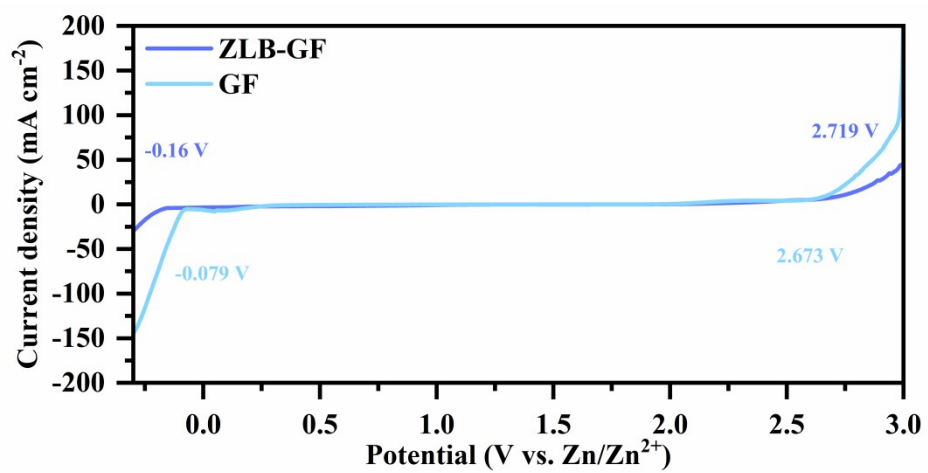

**Figure S16.** Electrochemical windows with GF and ZLB-GF separator obtained by LSV.

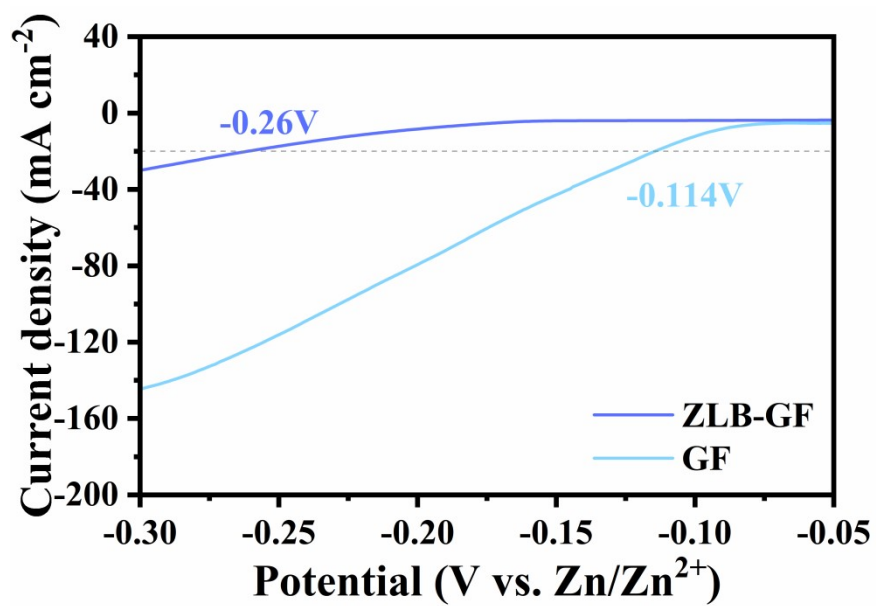

Figure S17. HER curves of ZnSO<sub>4</sub> electrolytes with GF and ZLB-GF.

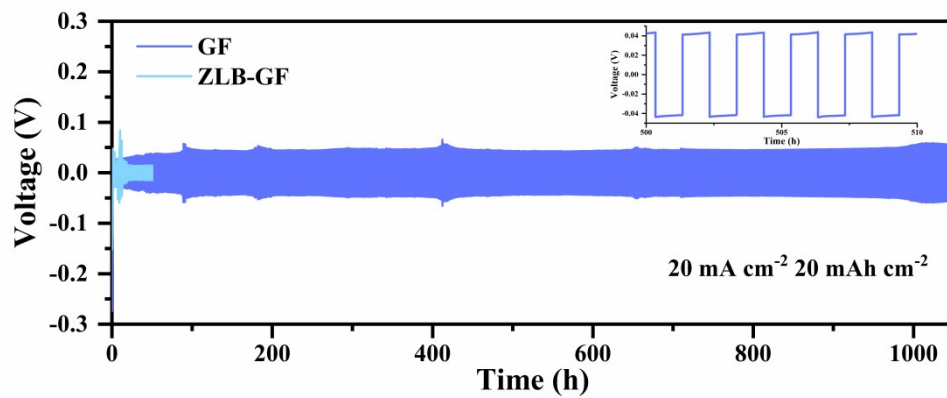

**Figure S18.** Cycling performance of Zn//Zn symmetric cells with GF and ZLB-GF separators.

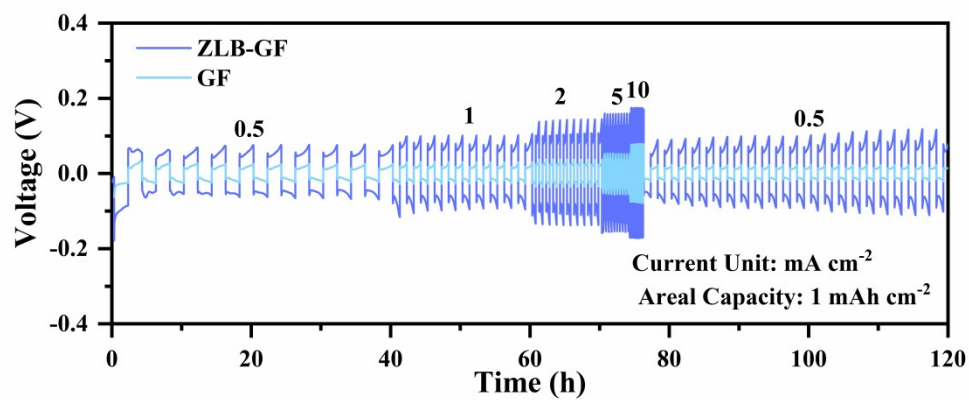

**Figure S19.** The rate performance of GF and ZLB-GF separators at various current densities with a fixed areal capacity of 1 mAh cm<sup>-2</sup>.

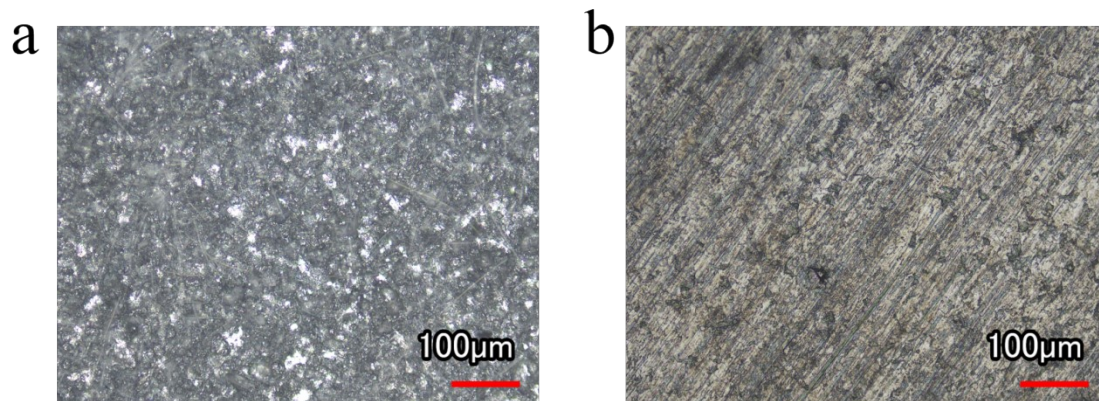

**Figure S20.** Optical micrographs of zinc anode after 100h of cycling using (a) GF and (b) ZLB-GF separators.

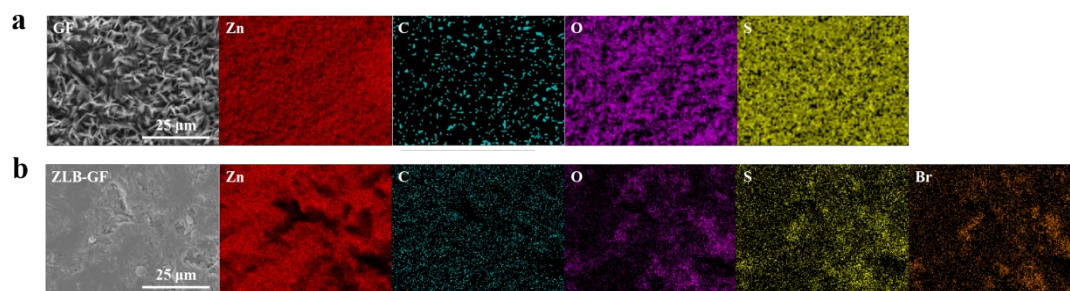

**Figure S21.** EDS mapping of zinc anode after 100h of cycling using (a) GF and (b) ZLB-GF separators.



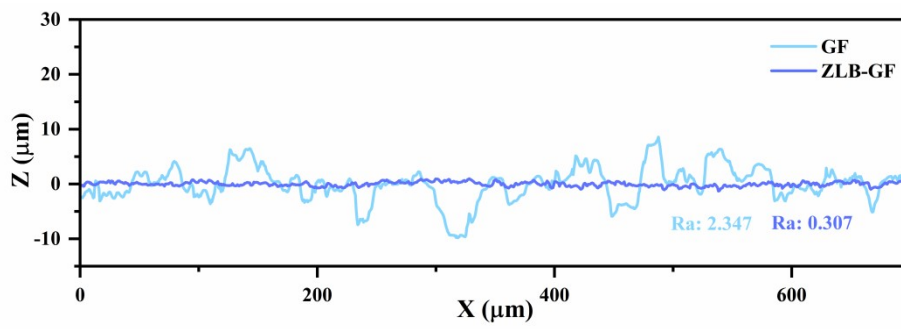

**Figure S22.** Surface roughness curves of zinc anode after 100h of cycling using GF and ZLB-GF separators.

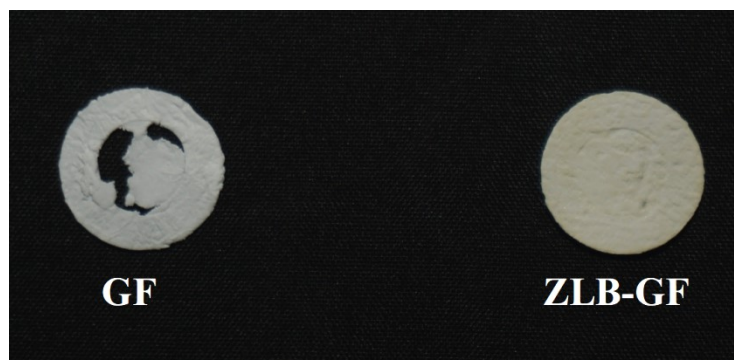

**Figure S23.** Electronic snapshots of the separators after 100h of cycling using GF and ZLB-GF separators.

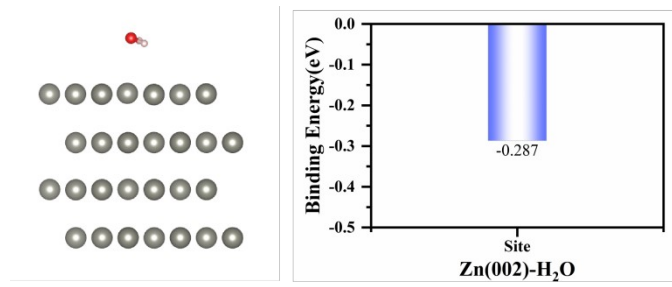

**Figure S24.** Binding energy between Zn and H<sub>2</sub>O molecule.

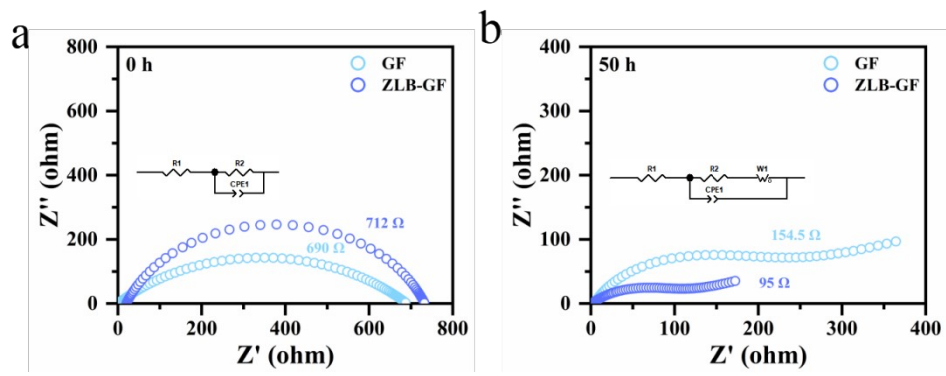

**Figure S25.** Nyquist plots of Zn//Zn symmetric cells using GF and ZLB-GF separators before (a) and after cycling (b).

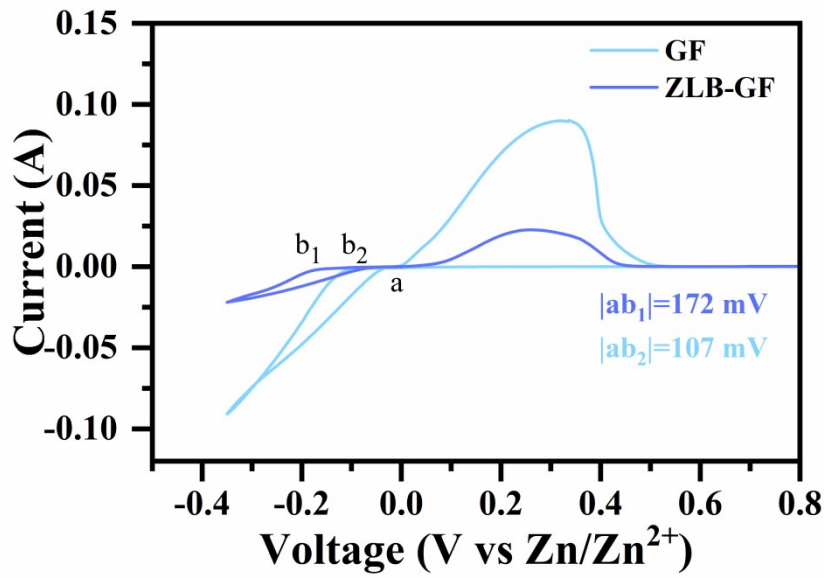

Figure S26. CV curves of Zn//Cu cells with GF and ZLB-GF separator.

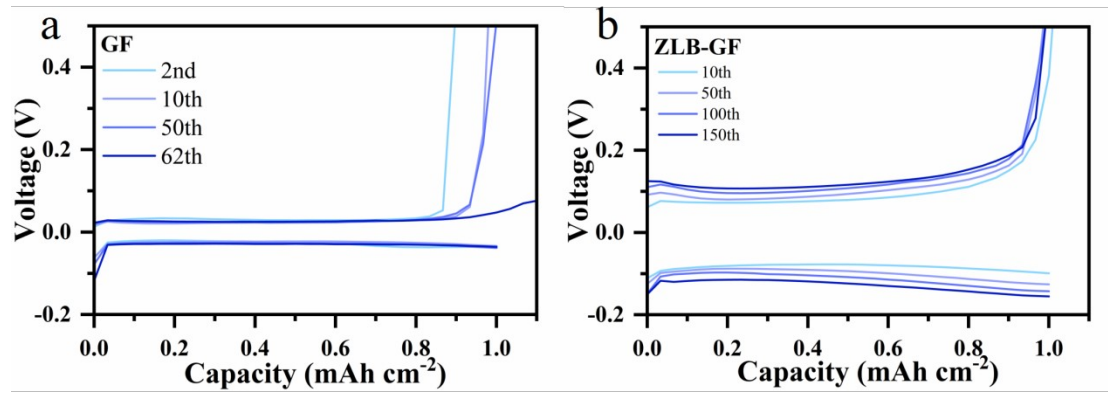

**Figure S27.** The GCD curves of Zn//Ti cells with (a) GF and (b) ZLB-GF separator.

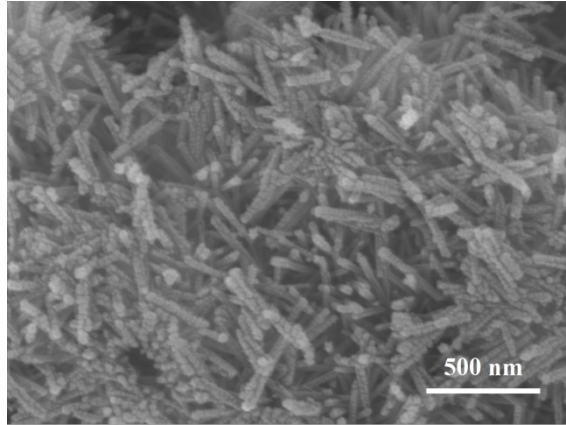

**Figure S28.** SEM image of MnO<sub>2</sub>.

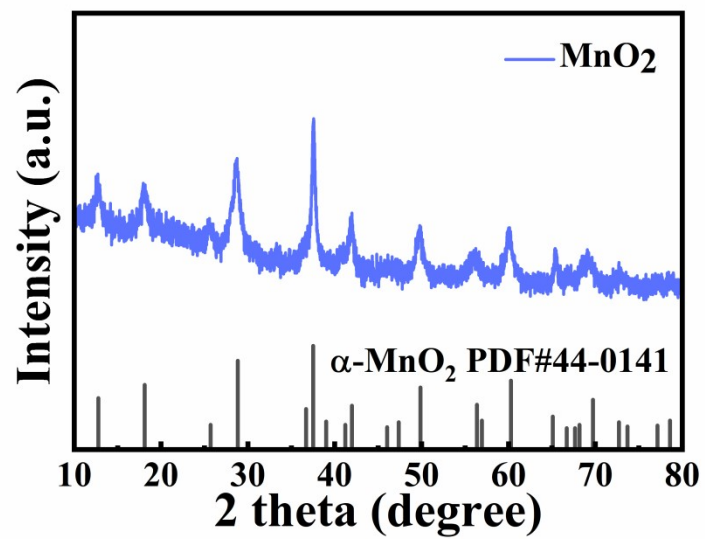

Figure S29. XRD pattern of MnO<sub>2</sub>.



**Table S1.** Element Signal of Z-GF and ZLB-GF separator.

| Element | Weight % |        |
|---------|----------|--------|
|         | Z-GF     | ZLB-GF |
| C       | 55.2     | 23.1   |
| N       | 17.2     | 2.1    |
| O       | 23.1     | 37.2   |
| Si      | 2.9      | 22.7   |
| S       | 1.6      | 3.0    |
| Br      | —        | 11.9   |

**Table S2.** Element Signal of zinc anode after 100h of cycling using GF and ZLB-GF separators.

| Element | Weight % |        |
|---------|----------|--------|
|         | GF       | ZLB-GF |
| C       | 6.5      | 13.2   |
| O       | 25.9     | 7.9    |
| S       | 7.1      | 1.1    |
| Zn      | 60.5     | 75.7   |
| Br      | —        | 2.1    |

**Table S3.** Comparison of the electrochemical performances of ZLB-GF separator with recently reported GF separator modification.

| Functionalized Separator                         | Current density (mA·cm <sup>-2</sup> ) | Capacity (mAh·cm <sup>-2</sup> ) | Life (h) | Ref.      |
|--------------------------------------------------|----------------------------------------|----------------------------------|----------|-----------|
| Modification zien                                | 10                                     | 10                               | 3100     | This work |
| Cellulose paper                                  | 5                                      | 5                                | 400      | 1         |
| Ti <sub>3</sub> C <sub>2</sub> Tx MXene          | 1                                      | 1                                | 1180     | 2         |
| MXene@NiO modified separator                     | 10                                     | 10                               | 500      | 3         |
| Vertical graphene                                | 10                                     | 1                                | 600      | 4         |
| N-doped carbon                                   | 1                                      | 1                                | 1100     | 5         |
| BaTiO <sub>3</sub>                               | 10                                     | 2.5                              | 1600     | 6         |
| g-C <sub>3</sub> N <sub>4</sub> coated separator | 3                                      | 1                                | 600      | 7         |
| MOF UiO-66                                       | 2                                      | 1                                | 1600     | 8         |
| Sulfonic cellulose@graphene                      | 10                                     | 10                               | 1400     | 9         |

## References

1. Z. Yang, W. Li, Q. Zhang, C. Xie, H. Ji, Y. Tang, Y. Li and H. Wang, *Materials Today Energy*, 2022, **28**, 101076.
2. Y. Su, B. Liu, Q. Zhang, J. Peng, C. Wei, S. Li, W. Li, Z. Xue, X. Yang and J. Sun, *Advanced Functional Materials*, 2022, **32**.
3. Y. An, Y. Tian, Q. Man, H. Shen, C. Liu, Y. Qian, S. Xiong, J. Feng and Y. Qian, *ACS Nano*, 2022, **16**, 6755-6770.
4. C. Li, Z. Sun, T. Yang, L. Yu, N. Wei, Z. Tian, J. Cai, J. Lv, Y. Shao, M. H. Rummeli, J. Sun and Z. Liu, *Advanced Materials*, 2020, **32**, 2003425.
5. X. Yang, W. Li, J. Lv, G. Sun, Z. Shi, Y. Su, X. Lian, Y. Shao, A. Zhi, X. Tian, X. Bai, Z. Liu and J. Sun, *Nano Research*, 2022, **15**, 9785-9791.
6. Y. Liang, D. Ma, N. Zhao, Y. Wang, M. Yang, J. Ruan, G. Yang, H. Mi, C. He and P. Zhang, *Advanced Functional Materials*, 2022, **32**, 2112936.
7. L. Wu, Y. Zhang, P. Shang, Y. Dong and Z.-S. Wu, *Journal of Materials Chemistry A*, 2021, **9**, 27408-27414.
8. Y. Song, P. Ruan, C. Mao, Y. Chang, L. Wang, L. Dai, P. Zhou, B. Lu, J. Zhou and Z. He, *Nano-Micro Letters*, 2022, **14**.
9. X. Zhang, J. Li, K. Qi, Y. Yang, D. Liu, T. Wang, S. Liang, B. Lu, Y. Zhu and J. Zhou, *Adv Mater*, 2022, **34**, e2205175.
